# Supplementary material for: Promising properties and applications in advanced electronic devices of Nd 0.6 Sr 0.3 Ba 0.1 MnO 3 Perovskite
Source: Research Square preprint supplement (doi:10.21203/rs.3.rs-7233919/v1), 2025-08-14
Supplement: Supplementary file 1 [file 257c6d6ab3127886bebb9612.docx]

**Highlights**

- Grain size (~49 nm) and conductivity tuning XRD
- OLPT and CBH models describe temperature-dependent conduction mechanisms.
- Electrical modulus reveals a structural transition around 500 K affecting relaxation.
- Dielectric study shows relaxor behavior and Maxwell-Wagner interfacial polarization.
- The material shows promise for gas sensors, memory devices, and energy systems.
