# Supplementary material for: Promising properties and applications in advanced electronic devices of Nd 0.6 Sr 0.3 Ba 0.1 MnO 3 Perovskite
Source: Research Square preprint supplement (doi:10.21203/rs.3.rs-7233919/v1), 2025-08-14
Supplement: Supplementary file 2 [file 53051cd703aea35bbefa39be.docx]

**Supplementary Informations**

**Promising properties and applications in advanced electronic**

**devices of Nd0.6Sr0.3Ba0.1MnO3 Perovskite**

**Z. Aydi a, A. Dhahria, M. Jeddi a, b, K. Khirounic, E. Dhahri a**

*a Applied Physics Laboratory, Faculty of Sciences, BP 1171, 3000, Sfax University, Tunisia.*

*b Higher Institute of Computer Science and Multimedia, BP 122, 6033, Gabes University, Tunisia.*

*cLaboratory of Physics of Materials and Nanomaterials Applied to the Environment (LaPhyMNE), Faculty of Sciences of Gabès cited Erriadh, University of Gabès, 6079 Gabès, Tunisia.*

**Corresponding author: E-mail address: aydizouhayra8@gmail.com (Zouhayra Aydi)*

The stepwise variations in the alternating conductivity 𝜎ac (T, f) (**Fig. SI1**) require a detailed analysis to accurately identify the conduction mechanisms, necessitating a precise estimation of the frequency exponent S. To eliminate the influence of the direct current conductivity (𝜎dc), the approach proposed by Nowick et al. 1 is applied by plotting the normalized conductivity as a function of frequency, where (0) represents the conductivity measured at 40 Hz, assumed to be close to 𝜎dc (**Fig. 5**). The analysis of this normalized conductivity (**Fig. SI1 a**) reveals two distinct behaviors, characterized by slopes S1 and S2, enabling the identification of different conduction regimes. The temperature dependence of the exponents S1(T) and S2(T) (**Fig. SI1 b, c**) highlights the presence of four distinct conduction mechanisms depending on both temperature and sample characteristics. In Region I (S1), at low temperatures (T < 500 K), charge transport follows an Overlapping Large Polaron Tunneling (OLPT) mechanism, whereas at higher temperatures (T > 500 K), a transition occurs to a Correlated Barrier Hopping (CBH) model. In Region II (S2), at lower temperatures, conduction is mainly governed by the Quantum Mechanical Tunneling (QMT) mechanism, differing from OLPT by the partial overlap of potential wells, which reduces tunneling efficiency. At higher temperatures, conduction also follows the CBH model, indicating a transition from a tunneling-dominated regime to a charge hopping mechanism across Coulomb barriers. These conduction mechanisms in Nd0,6Sr0,3Ba0.1MnO3 ₃ are closely related to charge carrier interactions with the crystal lattice, where the coexistence of Mn³⁺/Mn⁴⁺ states play a crucial role in polaron formation, influencing conduction dynamics 2,3. Additionally, the presence of oxygen vacancies and temperature-induced structural modifications impact charge carrier mobility 4,5, explaining the transitions between OLPT, QMT, and CBH regimes. These findings indicate that the alternating current conduction in Nd0,6Sr0,3Ba0.1MnO3 is temperature-dependent, with tunneling mechanisms prevailing at lower temperatures, while charge transport at higher temperatures is primarily governed by the CBH model. This behavior aligns with the frequency-dependent analysis of the alternating conductivity.










**Figure SI1:** (a)vs. frequency plots at different temperatures (300-640K). (b) and (c) Temperature dependence of frequency exponents (S1 and S2) obtained from plots in (a).

The OLPT conduction mechanism dominates in Nd₀.₆Sr₀.₃Ba₀.₁MnO₃ nanoparticles within the temperature range of 300 K to 500 K. Coşkun et al., along with Naseem et al. 6,7, have also reported this mechanism in LaCrO₃ and LaFeO₃ perovskite nanoparticles. According to the OLPT model, polaron energy originates from polarization changes within the crystal lattice 8.

**References**

1 S. Kumar, A. K. Shukla and K. Sreenivas, *Applied Physics A*, 2022, **128**, 381.

2 L. Zhao, X. Li, Q. Zhao, Z. Qu, D. Yuan, S. Liu, X. Hu and G. Chen, *Journal of hazardous materials*, 2010, **184**, 704–709.

3 J. P. Singh, S. O. Won, W. C. Lim, I.-J. Lee and K. H. Chae, *Journal of Molecular Structure*, 2016, **1108**, 444–450.

4 S. Ke, P. Lin, H. Fan, H. Huang and X. Zeng, *Journal of Applied Physics*.

5 M. A. Kastner, R. J. Birgeneau, C. Y. Chen, Y. M. Chiang, D. R. Gabbe, H. P. Jenssen, T. Junk, C. J. Peters, P. J. Picone, T. Thio, T. R. Thurston and H. L. Tuller, *Phys. Rev. B*, 1988, **37**, 111–117.

6 M. Coşkun, Ö. Polat, F. M. Coşkun, Z. Durmuş, M. Çağlar and A. Türüt, *Journal of Alloys and Compounds*, 2018, **740**, 1012–1023.

7 S. Naseem, S. Khan, S. Husain and W. Khan, *Journal of Electronic Materials*, 2018, **47**, 1916–1923.

8 A. Ghosh, S. Bhattacharya, D. P. Bhattacharya and A. Ghosh, *Journal of Physics: Condensed Matter*, 2007, **20**, 035203.
