# Supplementary material for: Promising properties and applications in advanced electronic devices of Nd 0.6 Sr 0.3 Ba 0.1 MnO 3 Perovskite
Source: Research Square preprint supplement (doi:10.21203/rs.3.rs-7233919/v1), 2025-08-14
Supplement: Supplementary file 3 [file 6685b9ebc8a32eec6af99a71.docx]

Frequency dependence of AC conductivity (σac) and corresponding fittings at various temperatures. Temperature dependence of the real part of the permittivity (ɛ′) at selected frequencies and Nyquist plots of Nd₀.₆Sr₀.₃Ba₀.₁MnO₃ at different temperatures.
